# Supplementary material for: Characteristics of Biologically Active Compounds in Cornelian Cherry Meads
Source: PubMed Central journal article supplement (PMC6222799; doi:10.3390/molecules23082024), 2018-08-14
Supplement: molecules-23-02024-s001.pdf [file molecules-23-02024-s001.pdf]

1 **Characteristics of biologically active compounds**  
2 **in Cornelian cherry meads**

3 Kinga Adamenko<sup>1,\*</sup>, Joanna Kawa-Rygielska<sup>1</sup>, Alicja Z. Kucharska<sup>2</sup>, Narcyz Piórecki<sup>3,4</sup>

4

5 <sup>1</sup>Department of Fermentation and Cereals Technology, Faculty of Food Science,  
6 Wrocław University of Environmental and Life Sciences, Chełmońskiego 37, 51-630  
7 Wrocław, Poland; joanna.kawa-rygielska@upwr.edu.pl

8 <sup>2</sup>Department of Fruit, Vegetable and Plant Nutraceutical Technology, Faculty of  
9 Food Science, Wrocław University of Environmental and Life Sciences,  
10 Chełmońskiego 37, 51-630 Wrocław, Poland; alicja.kucharska@upwr.edu.pl

11 <sup>3</sup>Arboretum and Institute of Physiography in Bolestraszyce, 37-700 Przemyśl,  
12 Poland; narcyz360@gmail.com

13 <sup>4</sup>Faculty of Physical Education, University of Rzeszów, Towarnickiego 3, 35-959  
14 Rzeszów, Poland

15 \*Correspondence: kinga.adamenko@upwr.edu.pl; Tel.: +48-71-323-9417

16

17

18

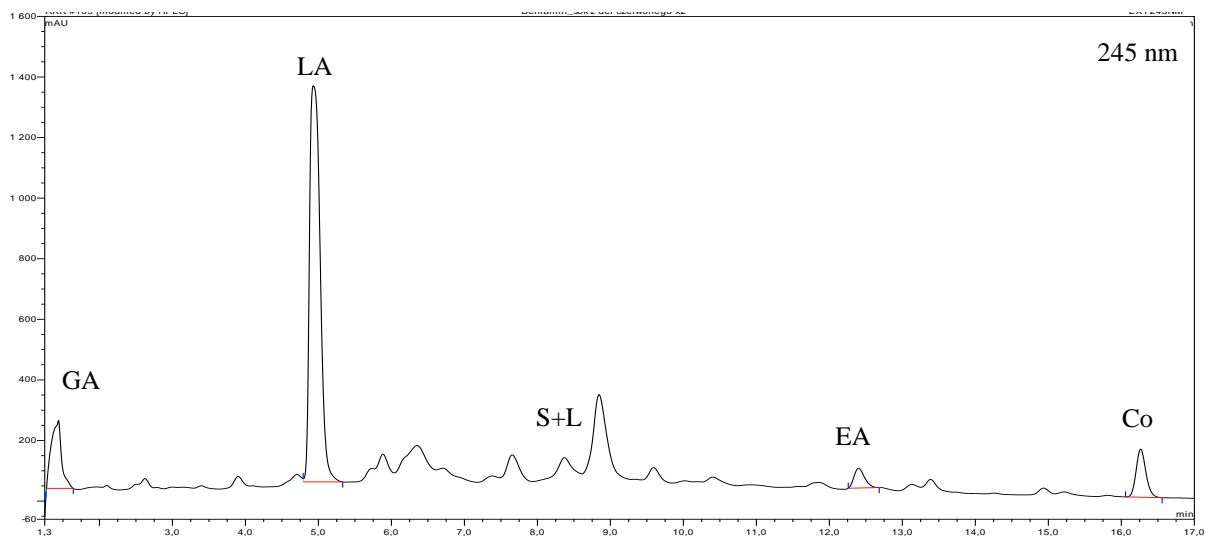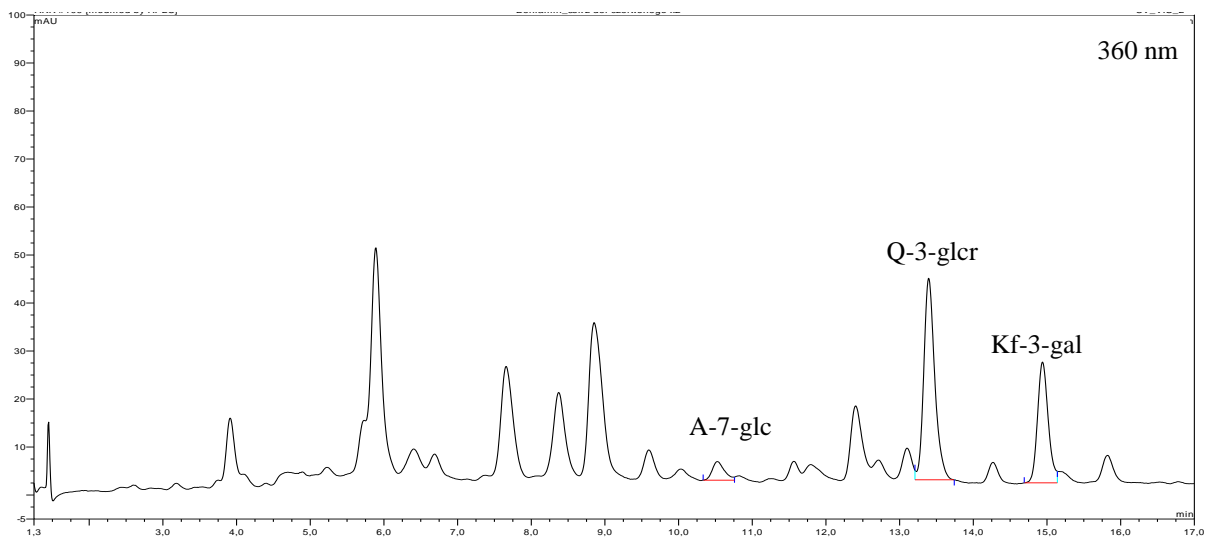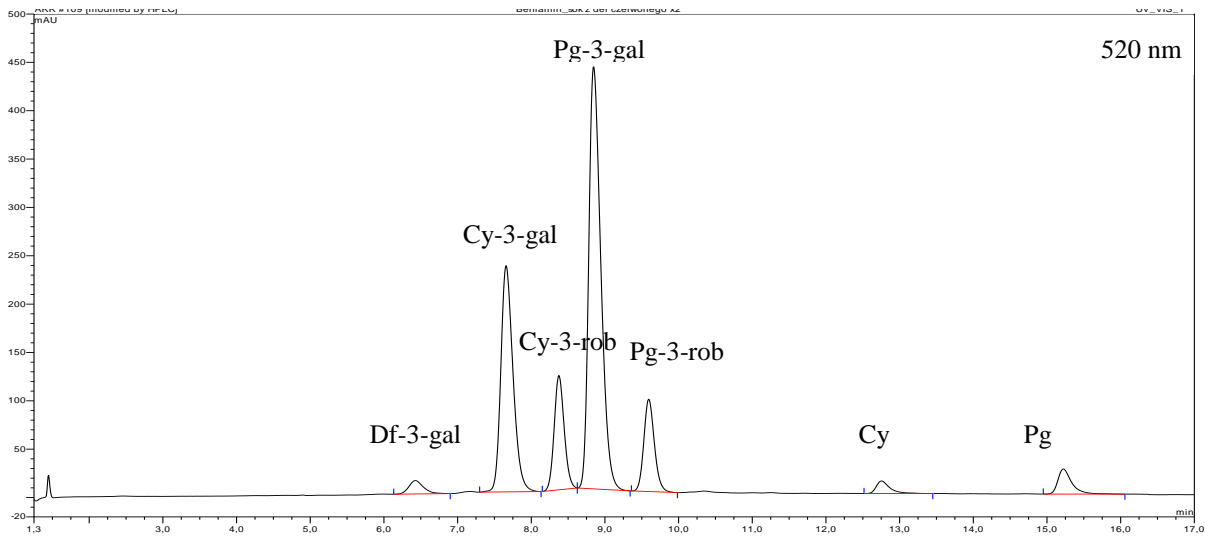

20 Fig. S1. HPLC-DAD chromatograms (245 nm, 360 nm, 520 nm) of compounds of red  
21 cornelian cherry juice (GA, gallic acid; LA, loganic acid; S, Sweroside; Lo, Loganin; Co,  
22 cornuside; EA, ellagic acid; Df-3-gal, delphinidin 3-O-galactoside; Cy-3-gal, cyjanidin 3-O-  
23 galactoside; Cy-3-rob, cyjanidin 3-O-robinobioside; Pg-3-gal, pelargonidin 3-O-galactoside;  
24 Pg-3-rob, pelargonidin 3-O-robinobioside; Cy, cyjanidin; Pg, pelargonidin; A-7-glc,  
25 aromadendrin 7-glucoside; Q-3-glcr, quercetin 3-O-glucuronide; Kf-3-gal, kaempferol 3-O-  
26 galactoside).  
27
